# Supplementary material for: Self-assembly of diphenylalanine peptides into microtubes with “turn on” fluorescence using an aggregation-induced emission molecule
Source: Royal Society of Chemistry journal article supplement (doi:10.1039/c3cc45320k), 2013-01-01
Supplement: c3cc45320k.pdf [file c3cc45320k.pdf]

1  
2  
3  
4  
5  
6  
7  
8  
9

## Supporting Information

### **Self-Assembly of Diphenylalanine Peptide into Microtubes with “Turn on” Fluorescence by an Aggregation-Induced Emission Molecule**

Na Na, Xiaoyan Mu, Qiuling Liu, Jiying Wen, Fangfang Wang and Jin Ouyang\*

---

\* Corresponding author: Prof. Dr. Jin Ouyang, College of Chemistry, Beijing Normal University, Beijing 100875, P.R. China

E-mail: [jinoyang@bnu.edu.cn](mailto:jinoyang@bnu.edu.cn) ; Fax: +86-10-62799838

## 10 Experimental Section

11 **Reagents.** All chemicals were of analytical or higher grade. All solutions were  
12 prepared using ultrapure water from a Millipore Simplicity 185 water purification  
13 system (Millipore, Milford, MA, USA). The lyophilized diphenylalanine  
14 ( $\text{NH}_2\text{-Phe-Phe-COOH}$ , FF,  $\geq 98\%$ ), 1,1,1,3,3,3-hexafluoro-2-propanol (HFP) were  
15 purchased from Sigma-Aldrich Co. (USA). FF was characterized by NMR:  $^1\text{H}$  NMR  
16 ( $\text{CD}_3\text{OD}$ , 400 MHz):  $\delta$  7.35~7.24 (m, 10H), 4.52 (dd,  $J_1 = 8.1$  Hz,  $J_2 = 4.8$  Hz, 1H),  
17 3.99 (dd,  $J_1 = 9.0$  Hz,  $J_2 = 4.8$  Hz, 1H), 3.28~3.22 (m, 2H), 3.02 (dd,  $J_1 = 13.9$  Hz,  $J_2$   
18 = 8.1 Hz, 1H), 2.92 (dd,  $J_1 = 14.4$  Hz,  $J_2 = 9.0$  Hz, 1H). The electrospray mass  
19 spectra of FF is shown in Figure S1-A, which demonstrated the characteristic ions of  
20 FF in the positive mode including  $[\text{M}+\text{H}]^+$  ( $m/z$  313),  $[\text{M}+\text{Na}]^+$  ( $m/z$  335),  $[2\text{M}+\text{H}]^+$   
21 ( $m/z$  625) and  $[2\text{M}+\text{Na}]^+$  ( $m/z$  647).

22 9, 10-Bis[4-(3-sulfonatopropoxyl)-styryl] anthracene (BSPSA) was synthesized  
23 according to our previous works.<sup>15</sup> Briefly, 9,10-Bis(4-methoxystyryl)anthracene was  
24 first synthesized by dissolving 9,10-dibromoanthracene, 4-methoxystyrene,  $\text{K}_3\text{PO}_4$   
25 and  $\text{Pd}(\text{OAc})_2$  in DMAC, and then stirred at 110 °C for 24 h. Then, the obtained  
26 9,10-Bis(4-methoxystyryl)anthracene and dry  $\text{CH}_2\text{Cl}_2$  were mixed and cooled to  
27 -78 °C, after which boron tribromide/ $\text{CH}_2\text{Cl}_2$  (1.51 g/10 mL) was added. After  
28 stirring overnight, water was added to generate 9,10-Bis(4-hydroxystyryl)anthracene.  
29 At last, 9,10-Bis(4-hydroxystyryl)anthracene was added into anhydrous under  
30 nitrogen, after which NaOEt/anhydrous ethanol was slowly added. Then, with the  
31 addition of 1,3-propanesultone/ethanol, the mixture was vigorously stirred overnight

32 and a yellow product of BSPSA was precipitated. <sup>1</sup>H NMR (DMSO-d<sub>6</sub>, 400 MHz): δ  
33 8.40 (d, J = 3.3 Hz, 2H), 8.38 (d, J = 3.3 Hz, 2H), 7.96 (d, J = 16.5 Hz, 2H), 7.74 (d, J  
34 = 8.7 Hz, 4H), 7.55 (d, J = 3.2 Hz, 2H), 7.53 (d, J = 3.2 Hz, 2H), 7.01 (d, J = 8.7 Hz,  
35 4H), 6.86 (d, = 16.5 Hz, 2H), 4.13 (t, J = 6.5 Hz, 4H), 2.58 (t, J = 7.2 Hz, 4H), 2.03 (m,  
36 4H). The electrospray mass spectra of BSPSA are shown in Figure S1-B, which  
37 shows the characteristic ion of [M-2Na]<sup>2-</sup> (*m/z* 328) in the negative mode.

38 **Self-assembly of FF.** For the self-assembly, 10 mg of lyophilized FF was  
39 dissolved in 100 μL HFP to disrupt any possible aggregation in the peptide sample.  
40 Then, 20 μL of FF/HFP (100 mg/mL) solution was transferred to a 1.5 ml centrifuge  
41 tube, and allowed to dry by evaporation under ambient conditions. After FF/HFP  
42 solution was dried completely by evaporation at ambient conditions, FF was  
43 re-solubilized in ultrapure water by addition of 1 mL water<sup>20</sup> or a certain  
44 concentration of BSPSA aqueous solution and subsequent ultrasonic treated at 65 °C  
45 for 30 min. The FF aqueous solution was then annealed at room temperature and  
46 allowed to age for one day. The obtained assemblage was utilized for further  
47 characterization.

48 **Characterization Methods.** Fluorescence microscope images were recorded on an  
49 Olympus IX71 fluorescence microscope (Olympus, Japan). 20 μL 0.5 mg/ml FF  
50 aqueous solution was pipetted onto a glass slide to dry by evaporation under ambient  
51 conditions. Pictures were then taken after the assembly procedures. Scanning electron  
52 microscope (SEM) photographs were taken on a Hitachi S-4800 scanning electron  
53 microscope (Hitachi, Japan) by dripping 30 μL 0.5 mg/ml FF aqueous solution on

54 glass slide to dry. Before SEM imaging, a thin layer of Pt was coated on the film  
55 surface by an Auto Fine Coater (JEOL) at a current of 20 mA for 150 s. Fluorescence  
56 spectra were recorded by a SHIMADZU RF-5301PC spectrophotometer (Shimadzu,  
57 Japan) at 25 °C (5-nm slit width, 1-cm path-length cuvettes,). For polarization  
58 experiments, the obtained microtubes after self-assembly of Phe-Phe in BSPSA  
59 solution were directly subjected to the test in aqueous solution. UV-Vis absorption  
60 spectra were obtained with a TU-1901 UV-Vis spectrophotometer (Beijing, China).  
61 Circular dichroism (CD) spectra were recorded on a Pistar  $\pi$ -180 spectrophotometer  
62 (Applied Photophysics Ltd., UK) at room temperature using 1 mm quartz cells. Scans  
63 were obtained in a range between 190 and 350 nm by taking points at 1 nm (time per  
64 point: 2 s, Bandwidth: 4 nm). Three spectra were averaged to improve the  
65 signal-to-noise ratio.  
66

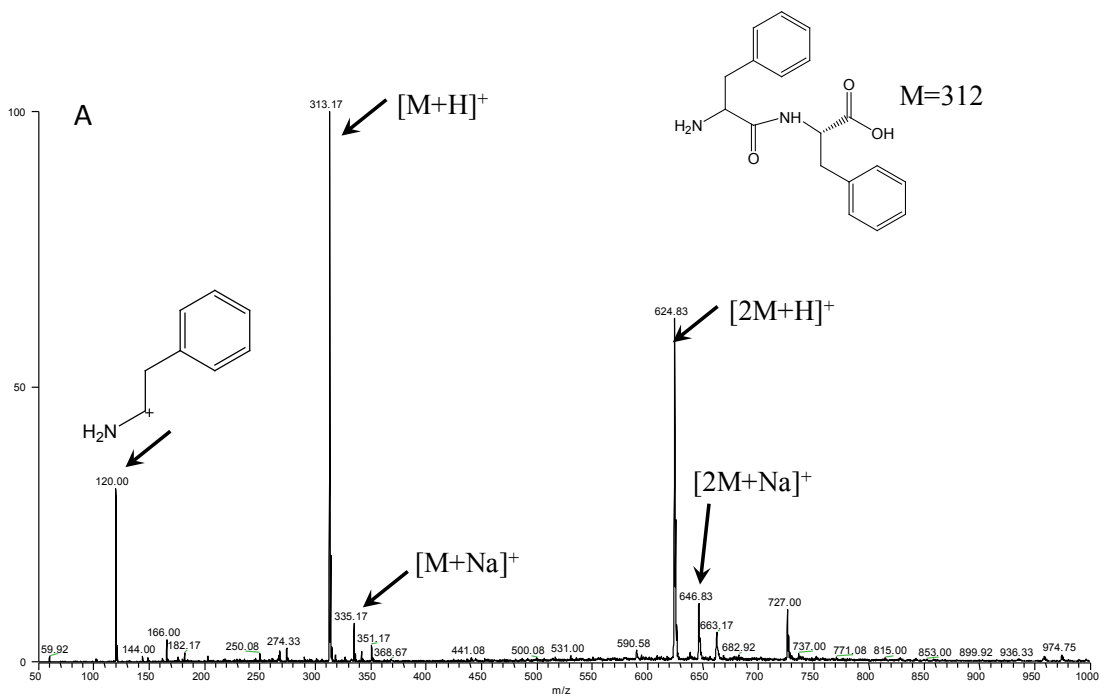

67

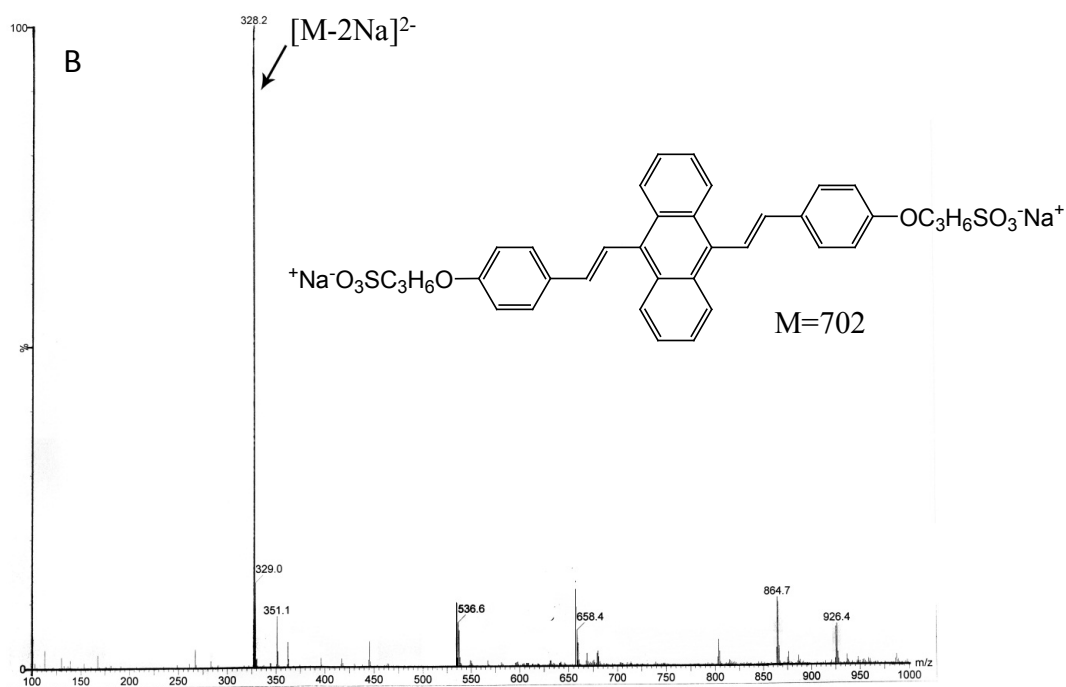

68

69 Figure S1. Mass spectra of FF (A) and BSPSA (B).

70

71

72

73

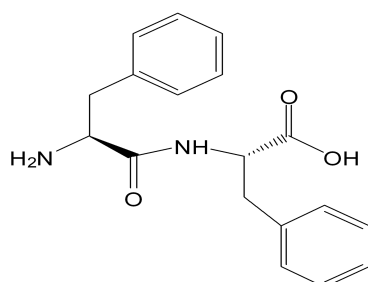

**phenylalanine**

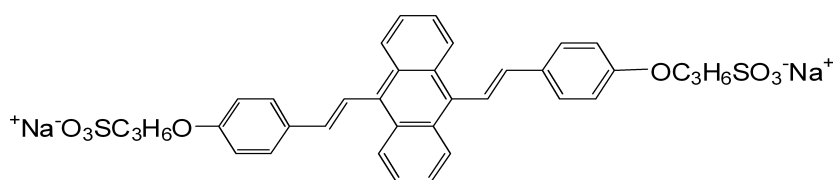

**9,10-bis[4-(3-sulfonatopropoxy)styryl] anthracene (BSPSA) sodium**

74

75 **Figure S2.** Molecular structure of phenylalanine and BSPSA.

76

77

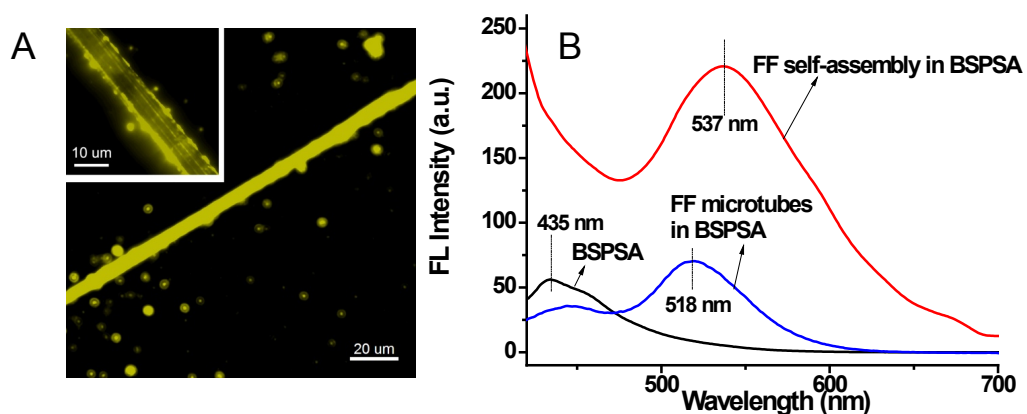

78

79

80 **Figure S3.** (A) Fluorescence microscope image of microtubes obtained by  
81 self-assembly of 2.0 mg/mL FF in water and then incubated with 0.01 mg/mL BSPSA  
82 solution. (B) Fluorescence spectra of BSPSA, microtubes of incubating formed  
83 non-fluorescence microtubes with BSPSA, and microtubes obtained by FF  
84 self-assembly in BSPSA solution. BSPSA concentration: 0.01 mg/mL.

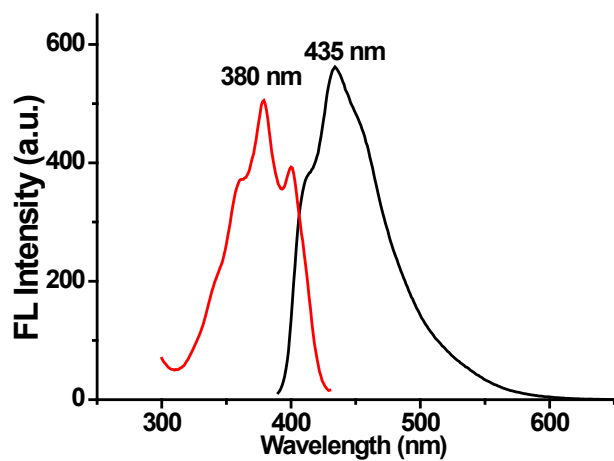

85

86 **Figure S4.** Fluorescence spectrum of BSPSA solution excited at 380 nm (black line)

87 and the emission spectrum (red line). BSPSA concentration: 0.01 mg/mL.

88

89



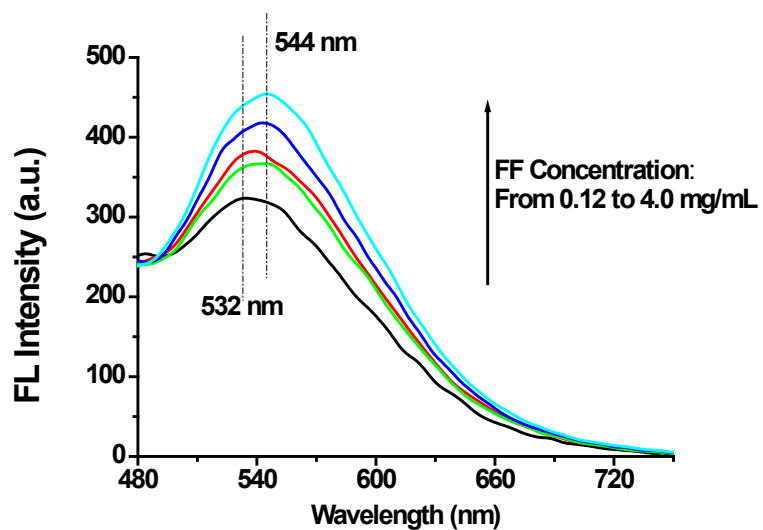

90

91 **Figure S5.** Fluorescence spectra of different concentration of FF assemblage in

92 BPSA solution. FF concentration: 0.12, 0.25, 0.5, 1.0, 2.0, 4.0 mg/mL, respectively.

93 BPSA concentration: 0.01 mg/mL. Excitation wavelength: 404 nm.

94

95

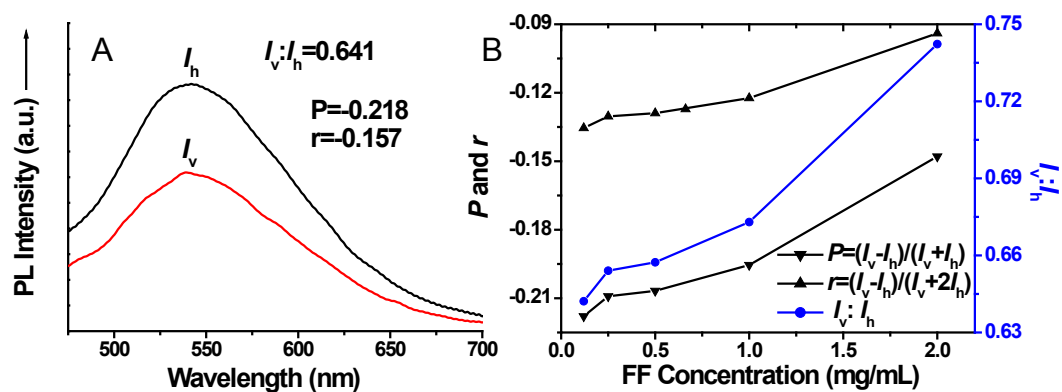

96

97

98 **Figure S6.** Polarized emissions from microtubes obtained by the self-assembly of

99 different concentrations of FF in BSPSA solutions. FF concentration: 0.12, 0.25, 0.5,

100 1.0, 2.0 mg/mL, respectively. BSPSA concentration: 0.01 mg/mL. Excitation

101 wavelength: 404 nm.

102

103

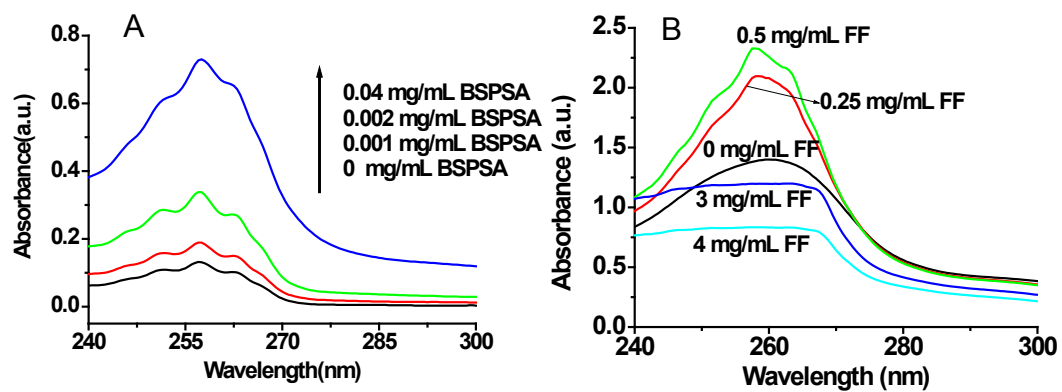

104

105 **Figure S7.** UV-Vis absorption spectra of microtubes by self-assembly of FF in  
106 BSPSA aqueous solution. (A) 2.0 mg/mL FF in different concentration of BSPSA  
107 solution. (B) Different concentration of FF in 0.01 mg/mL BSPSA.

108

109

110

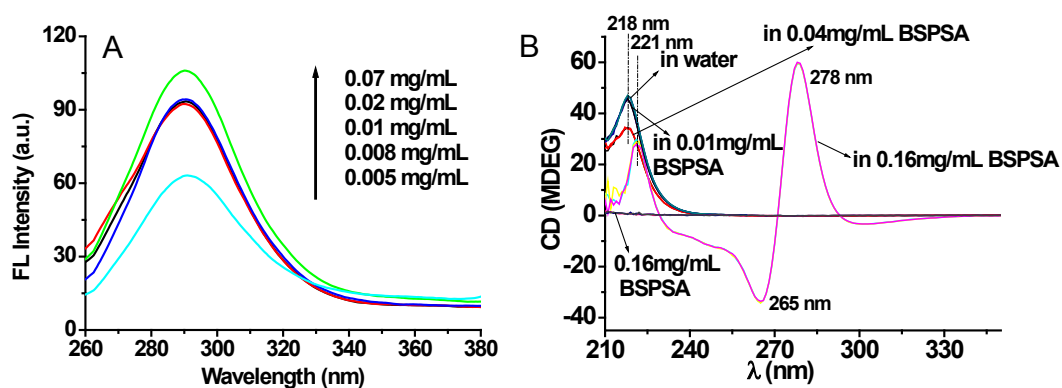

111

112 **Figure S8.** (A) FL spectra of 0.2 mg/mL FF solutions in different concentration of  
113 BSPSA aqueous solution (0.005 to 0.07 mg/mL). Excitation: 260 nm. (B) CD spectra  
114 of 0.16 mg/mL BSPSA solution, microtubes obtained by self-assembly of 2.0 mg/mL  
115 FF in water, 0.01, 0.04 and 0.16 mg/mL BSPSA aqueous solution. The samples were  
116 four times diluted for the test.
